# Supplementary material
Source: bioRxiv or medRxiv preprint supplement (https://www.biorxiv.org/highwire/filestream/25686/field_highwire_adjunct_files/16/077701-6.pdf)

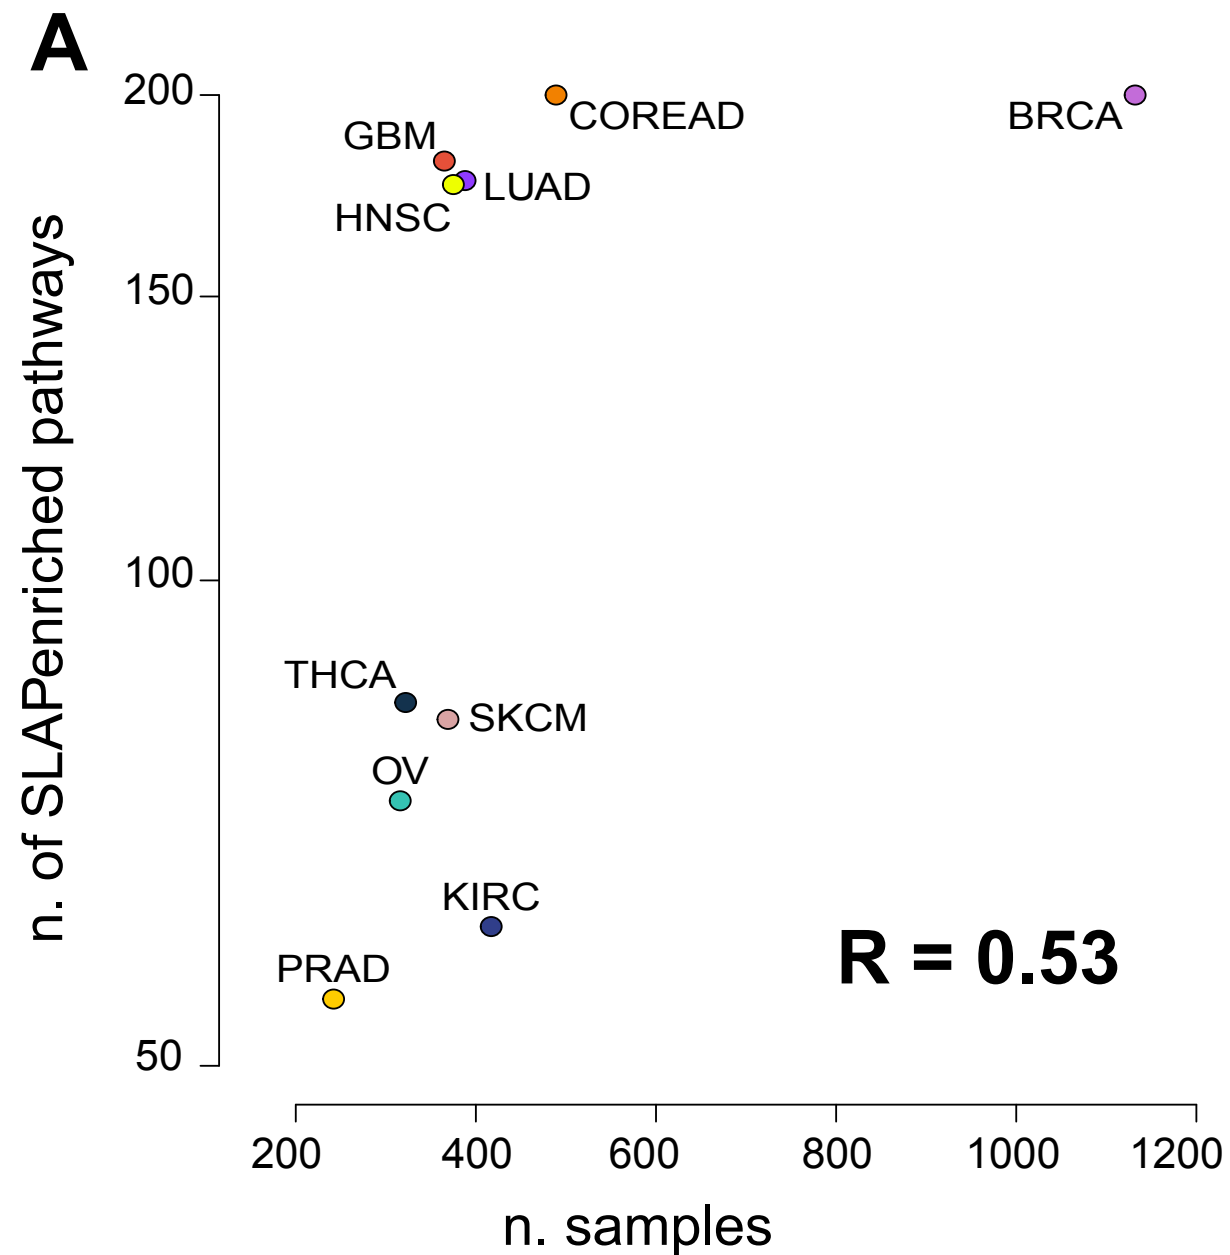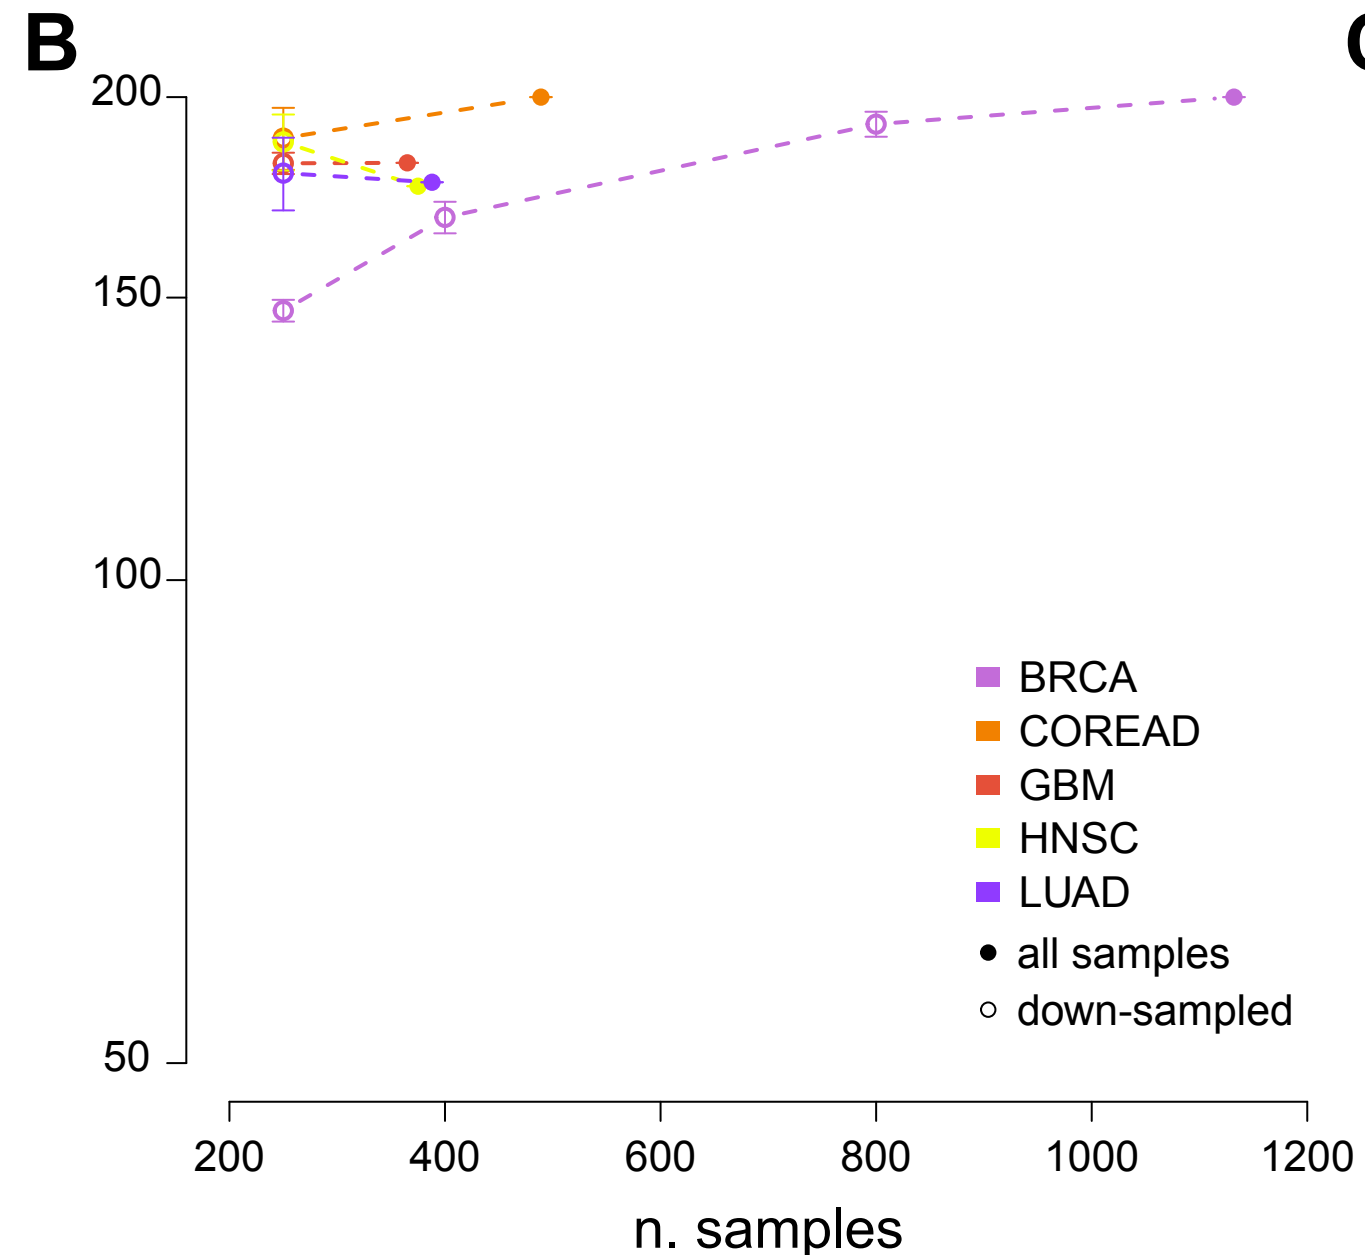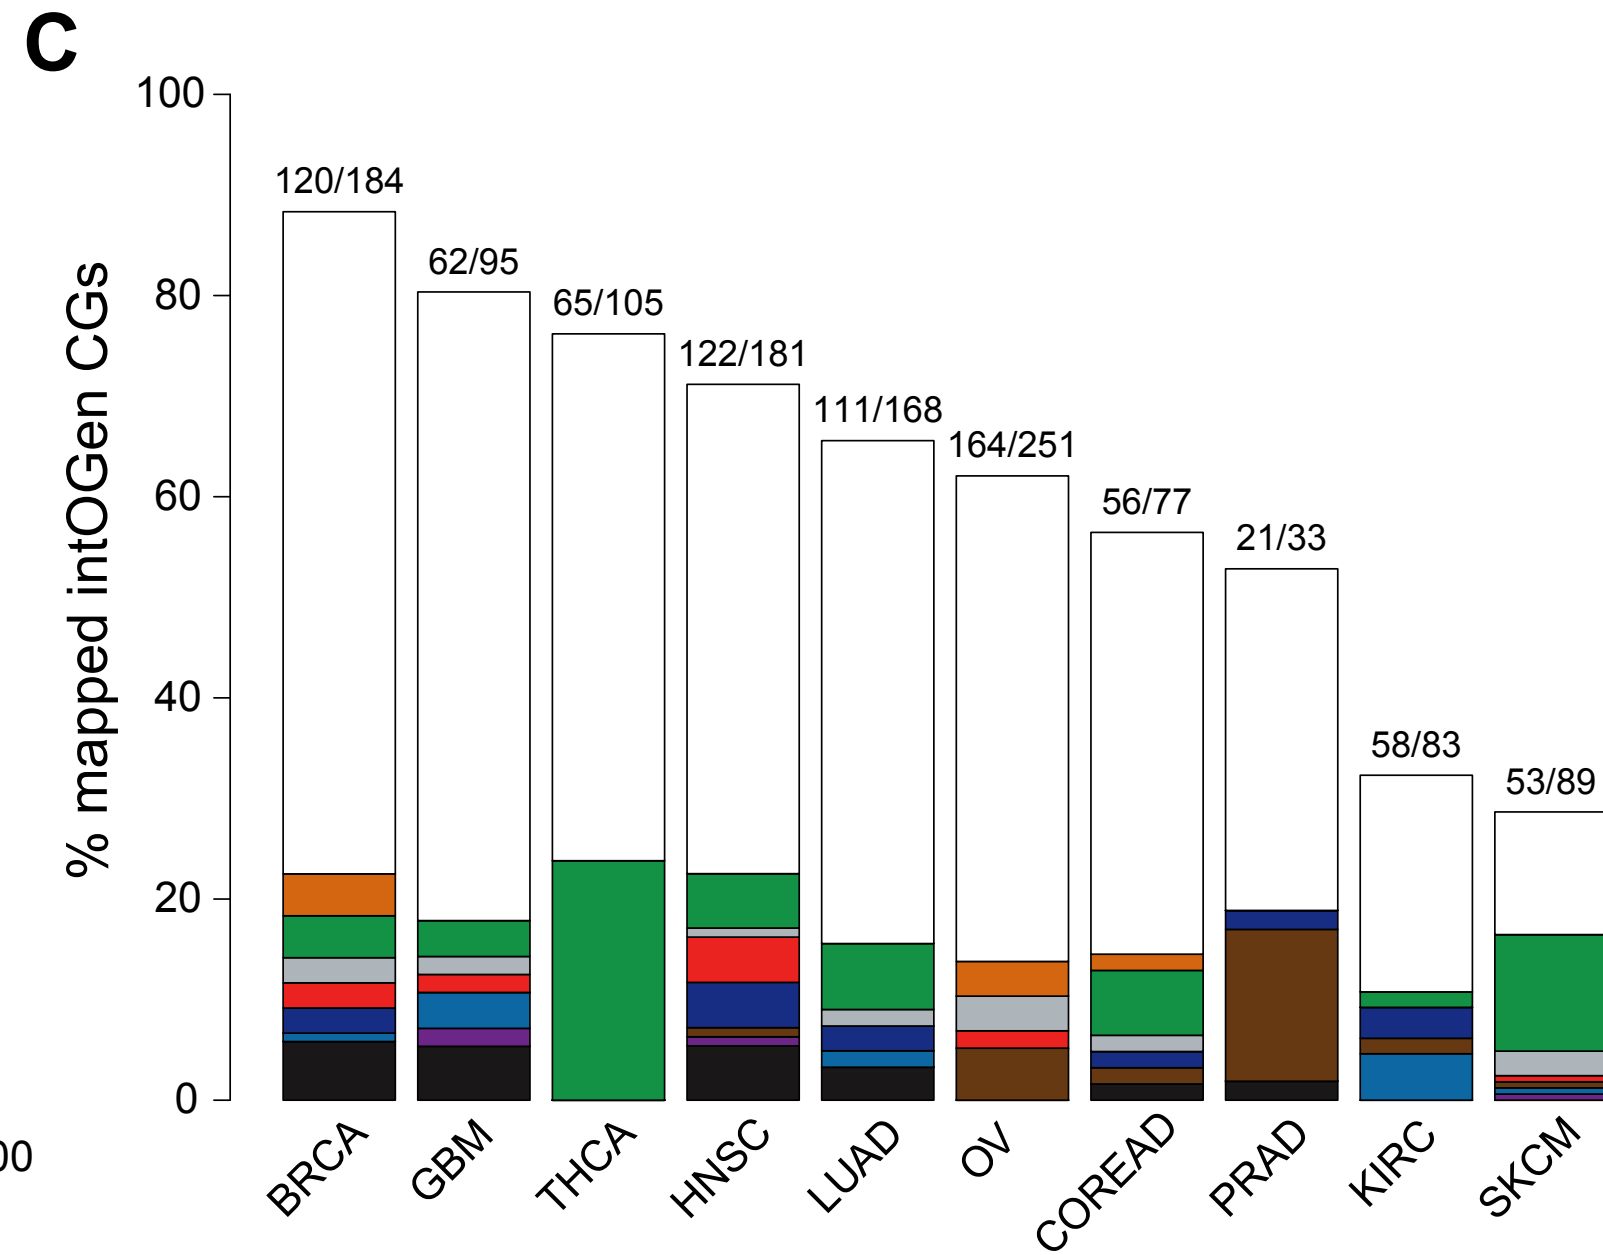

Supplement: Supplementary file [file 077701-6.pdf]
